# Supplementary material
Source: publisher figshare collection journal article supplement (https://acs.figshare.com/ndownloader/files/11128949)
Supplement: Supplementary file 1 [file 11128949]

## **Supporting information.**

### **New Inhibitors of Breast Cancer Resistance Protein (ABCG2) Containing a 2,4-Disubstituted Pyridopyrimidine Scaffold**

Michael K. Krapf, Jennifer Gallus, Sahel Vahdati, Michael Wiese\*

University of Bonn, Pharmaceutical Institute, An der Immenburg 4, 53121 Bonn, Germany

\*E-mail: mwiese@uni-bonn.de, phone: +49 228 73 5212

#### **Table of contents**

Dose-response curves of selected compounds using PLB-985 cells. S2

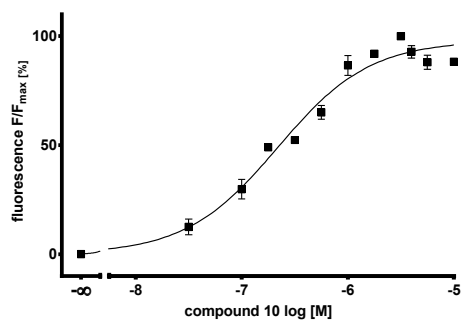

b)

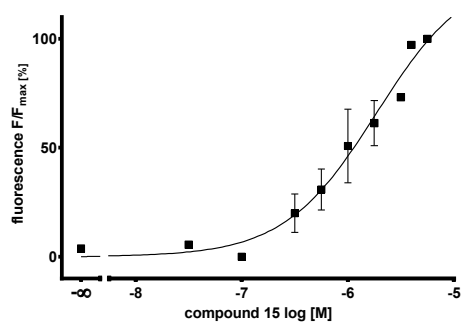

c)

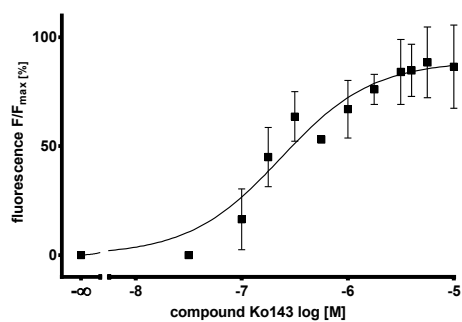

**Figure S1.** Concentration-response curve of compound **10** (a), **15** (b) and **56** (c) with ABCG2 expressing PLB-985 cell line in a Hoechst 33342 accumulation assay. IC<sub>50</sub> values of 219 nM (a), 1185 nM (b) and 233 nM (c) were in good accordance to those obtained with MDCK II BCRP cells (149 nM (a), 1210 nM (b) and 227 nM (c)).
